# Supplementary material for: Facile fabrication of polymer and carbon nanocapsules using polypyrrole core/shell nanomaterialsElectronic Supplementary Information (ESI) available: Experimental details for the synthesis and carbonization of PPy nanocapsules, instrumentation, XRD pattern and Raman spectrum. See http://www.rsc.org/suppdata/cc/b3/b316881f/
Source: Royal Society of Chemistry journal article supplement (doi:10.1039/b316881f), 2004-01-01
Supplement: b316881f.doc [file b316881f.doc]

# Supplementary Information for:

Facile fabrication of polymer and carbon nanocapsules using polypyrrole core/shell nanomaterials

Jyongsik Jang,* Xiang Li Li and Joon Hak Oh

*Hyperstructured Organic Materials Research Center and School of Chemical Engineering, Seoul National University, Shinlimdong 56-1, Seoul 151-742, Korea.*

***Synthesis of PPy nanocapsules***: A variable amount of cationic surfactants such as octyltrimethylammonium bromide (OTAB), decyltrimethylammonium bromide (DeTAB), and cetyltrimethyl- ammonium bromide (CTAB) was magnetically stirred in 40 mL of distilled water. 0.5 g (7.5 mmol) of pyrrole was added dropwise to the surfactant solution, and 0.5 g (3.8 mmol) of copper(II) chloride was put into the solution. Chemical polymerization proceeded for 3 h at 25°C. Then, 1.0 g (14.9 mmol) of pyrrole was added dropwise into the micellar solution. Iron(III) chloride (1.2 g, 7.4 mmol) was dissolved in a small amount of distilled water and the solution was added to the reaction mixture. After the chemical polymerization for 3 h at 25°C, the reaction product was moved to a separation funnel and excess methyl alcohol was poured. After precipitation, the upper solution containing surfactant, soluble PPy and residual oxidants was discarded and the PPy nanocapsule precipitate was dried in a vacuum oven at room temperature. Fig. S1 represents the shell thickness variation of PPy nanocapsules as a function of monomer amount.

***Preparation of carbon nanocapsules*:** A small amount of the crosslinked PPy nanocapsule was put into a quartz tube in an electric furnace under Ar flow (0.2 L min1). The sample was heated up to carbonization temperature at a heating rate 3°C min1, held for 3 h, and then naturally cooled to room temperature.

***Instrumental Analysis*:** The TEM images and EDX data were taken using a JEOL JEM-2000 EX II microscope and a Philips CM-20 microscope coupled with an EDX facility. The high resolution TEM image was taken with a JEOL JEM-2010 F microscope. The SEM images were obtained with a JEOL JSM-6700 F microscope. Elemental analysis was conducted with an EA 1110 apparatus (CE Instruments). XRD measurement was performed with a Rigaku DMAX-IIIA. Raman spectra were obtained using a Jobin-Yvon T64000 spectrometer equipped with an Ar-ion laser. Nitrogen adsorption/desorption isotherms were recorded with a Micromeritics ASAP 2000.

***XRD and Raman spectroscopy analyses of carbon nanocapcules*:** Fig. S2 shows XRD pattern and Raman spectrum of PPy nanocapsules carbonized at 1000°C. The XRD pattern of carbonized hollow nanospheres confirms the presence of graphite, as the characteristic 002 and 001 Bragg reflections of graphenes are clearly displayed. The graphite 002 reflection became sharper with increasing the carbonization temperature. The 002 peak sharpening is related to the widening and thickening of the graphite layers by heat treatment.1 The Raman spectrum of carbon nanocapsules showed two main peaks at 1580 and 1360 cm1. The band at 1580 cm1 is assigned to the E2g vibration of graphitic carbon with an sp2 electronic configuration. On the other hand, the peak at 1360 cm1 is attributable to the A1g mode of diamond-like carbon with an sp3 configuration.2 When the carbonization temperature increased from 1000°C to 1200°C, the area ratio of the two Raman bands (Asp2/Asp3) increased from 0.47 to 0.58. This means that the degree of graphitization of the carbon nanocapsules could be enhanced by carbonization at an elevated temperature.

***References***

1 G. T. Fey, Y. C. Kao, *Mater. Chem. Phys*. **2002**, *73*, 37.

2 a) F. Tuinstra, J. L. Koenig, *J. Chem. Phys.* **1970**, *53*, 1126. b) A. W. P. Fung, A. M. Rao, K. Kuriyama, M. S. Dresselhaus, G. Dresselhaus, M. Endo, N. Shindo, *J. Mater. Res*. **1993**, *8*, 489.

**Fig. S1** The shell thickness change of PPy nanocapsules with increasing monomer amount.

G002

G100

G110

F311

F110

F440

F024

(a)

F511

(b)

**Fig. S2** (a) Powder X-ray diffraction pattern (graphite, G; -Fe2O3, F) and (b) Raman spectrum of carbon nanocapsules carbonized at 1000°C.
